# Supplementary material for: Genome-wide structural modelling of TCR-pMHC interactions
Source: PubMed Central journal article supplement (PMC3852114; doi:10.1186/1471-2164-14-s5-s5), 2013-10-16
Supplement: 1471-2164-14-S5-S5-S8.pdf [file 1471-2164-14-S5-S5-S8.pdf]

**Table S6 - Comparisons between iMatrix and one-matrix of three MHC class I alleles on 389 complete pathogen database**

| MHC allele | iMatrix         |               |               |           | One-matrix      |               |               |           | (A)/(B) |
|------------|-----------------|---------------|---------------|-----------|-----------------|---------------|---------------|-----------|---------|
|            | No. of hits (A) | Positive hits | Negative hits | Precision | No. of hits (B) | Positive hits | Negative hits | Precision |         |
| HLA-A0201  | 701,897         | 360           | 187           | 0.66      | 511,587         | 265           | 135           | 0.66      | 1.37    |
| H-2-Kb     | 933,281         | 44            | 91            | 0.33      | 537,425         | 28            | 69            | 0.29      | 1.74    |
| H-2-Ld     | 386,429         | 119           | 63            | 0.65      | 264,302         | 97            | 49            | 0.66      | 1.46    |
